# Supplementary material for: A survey of potential acceptance of 9-valent HPV vaccine among Chinese male college students
Source: PubMed Central journal article supplement — Hum Vaccin Immunother. 2023 Nov 16;19(3):2272533. doi: 10.1080/21645515.2023.2272533 (PMC10760362; doi:10.1080/21645515.2023.2272533), 2023-11-16
Supplement: KHVI_A_2272533_SM3860.pdf [file KHVI_A_2272533_SM3860.pdf]

Supplement Table 1 Predictors of intention to get the 9-valent HPV vaccine (all variables).

| Item                                                                               | All participants<br>(N = 1547) | Intention to receive HPV vaccine |                                 | AOR(95%CI)         | P-value |
|------------------------------------------------------------------------------------|--------------------------------|----------------------------------|---------------------------------|--------------------|---------|
|                                                                                    |                                | Vaccine hesitancy<br>(N =850)    | Vaccine acceptance<br>(N = 697) |                    |         |
| <b>Residence</b>                                                                   |                                |                                  |                                 |                    |         |
| Rural                                                                              | 742(47.96%)                    | 406(47.76%)                      | 336(48.21%)                     | Ref                | /       |
| Urban                                                                              | 805(52.04%)                    | 444(52.23%)                      | 361(51.79%)                     | 0.885(0.703-1.115) | 0.300   |
| <b>College grade</b>                                                               |                                |                                  |                                 |                    |         |
| Freshman                                                                           | 627(40.53%)                    | 361(42.47%)                      | 266(38.16%)                     | Ref                | /       |
| Sophomore                                                                          | 572(36.97%)                    | 330(38.82%)                      | 242(34.72%)                     | 0.910(0.702-1.115) | 0.475   |
| Junior                                                                             | 223(14.41%)                    | 108(12.71%)                      | 115(16.50%)                     | 1.393(0.981-1.978) | 0.064   |
| Senior and fifth                                                                   | 125(8.08%)                     | 51(6.00%)                        | 74(10.62%)                      | 1.124(0.712-1.777) | 0.615   |
| <b>BMI (kg/m<sup>2</sup>)</b>                                                      |                                |                                  |                                 |                    |         |
| <18.5                                                                              | 188(12.15%)                    | 110(12.94%)                      | 78(11.19%)                      | Ref                | /       |
| 18.5-24                                                                            | 1034(66.84%)                   | 548(64.47%)                      | 486(69.73%)                     | 1.406(0.983-2.011) | 0.062   |
| 24-28                                                                              | 258(16.68%)                    | 151(17.76%)                      | 107(15.35%)                     | 1.313(0.854-2.020) | 0.214   |
| >28                                                                                | 67(4.33%)                      | 41(4.82%)                        | 26(3.73%)                       | 0.827(0.414-1.651) | 0.590   |
| <b>Are you a medical student?</b>                                                  |                                |                                  |                                 |                    |         |
| No                                                                                 | 1376(88.95%)                   | 777(91.41%)                      | 599(85.94%)                     | Ref                | /       |
| Yes                                                                                | 171(11.05%)                    | 73(8.59%)                        | 98(14.06%)                      | 1.550(1.070-2.246) | 0.021   |
| <b>Current smoking status</b>                                                      |                                |                                  |                                 |                    |         |
| No                                                                                 | 1350(87.27%)                   | 751(88.35%)                      | 599(85.94%)                     | Ref                | /       |
| Yes                                                                                | 197(12.73%)                    | 99(11.65%)                       | 98(14.06%)                      | 1.074(0.738-1.564) | 0.708   |
| <b>Current drinking status</b>                                                     |                                |                                  |                                 |                    |         |
| No                                                                                 | 1147(74.14%)                   | 630(74.12%)                      | 517(74.18%)                     | Ref                | /       |
| Yes                                                                                | 400(25.86%)                    | 220(25.88%)                      | 180(25.82%)                     | 0.845(0.636-1.124) | 0.248   |
| <b>Romantic relationships</b>                                                      |                                |                                  |                                 |                    |         |
| Single, no romance experience                                                      | 586(37.88%)                    | 353(41.53%)                      | 233(33.43%)                     | Ref                | /       |
| Single, have romance experience                                                    | 487(31.48%)                    | 276(32.47%)                      | 211(30.27%)                     | 0.982(0.740-1.304) | 0.901   |
| In a romantic relationship                                                         | 474(30.64%)                    | 221(26.00%)                      | 253(36.30%)                     | 1.673(1.258-2.225) | < 0.001 |
| <b>Do you have relatives or friends with cervical cancer?</b>                      |                                |                                  |                                 |                    |         |
| No                                                                                 | 1479(95.60%)                   | 827(97.29%)                      | 652(93.54%)                     | Ref                | /       |
| Yes                                                                                | 68(4.40%)                      | 23(2.71%)                        | 45(6.46%)                       | 2.387(1.325-4.300) | 0.004   |
| <b>Do you have friends or relatives who have received 9-valent HPV?</b>            |                                |                                  |                                 |                    |         |
| No                                                                                 | 952(61.54%)                    | 571(67.18%)                      | 381(54.66%)                     | Ref                | /       |
| Yes                                                                                | 595(38.46%)                    | 279(32.82%)                      | 316(45.34%)                     | 1.388(1.083-1.780) | 0.010   |
| <b>HPV can cause genital warts and certain cancers.</b>                            |                                |                                  |                                 |                    |         |
| No                                                                                 | 541(34.97%)                    |                                  | 208(29.84%)                     | Ref                | /       |
| Yes                                                                                | 1006(65.03%)                   |                                  | 489(70.16%)                     | 1.176(0.903-1.532) | 0.228   |
| <b>HPV can only be transmitted through sexual behavior.</b>                        |                                |                                  |                                 |                    |         |
| No                                                                                 | 1186(76.66%)                   |                                  | 531(76.18%)                     | Ref                | /       |
| Yes                                                                                | 361(23.34%)                    |                                  | 166(23.82%)                     | 1.214(0.922-1.598) | 0.166   |
| <b>Men can't be infected with HPV.</b>                                             |                                |                                  |                                 |                    |         |
| No                                                                                 | 1194(77.18%)                   |                                  | 567(81.35%)                     | Ref                | /       |
| Yes                                                                                | 353(22.82%)                    |                                  | 130(18.65%)                     | 0.890(0.670-1.183) | 0.423   |
| <b>9-valent HPV vaccination can effectively prevent HPV-related cancers.</b>       |                                |                                  |                                 |                    |         |
| No                                                                                 | 260(16.81%)                    |                                  | 107(15.35%)                     | Ref                | /       |
| Yes                                                                                | 1287(83.19%)                   |                                  | 590(84.65%)                     | 0.678(0.450-1.022) | 0.064   |
| <b>The best age for receiving the 9-valent HPV vaccine is before 26 years old.</b> |                                |                                  |                                 |                    |         |
| No                                                                                 | 318(20.56%)                    |                                  | 132(18.94%)                     | Ref                | /       |
| Yes                                                                                | 1229(79.44%)                   |                                  | 565(81.06%)                     | 0.817(0.578-1.155) | 0.252   |
| <b>Are you in support of promoting the 9-valent HPV vaccine for men?</b>           |                                |                                  |                                 |                    |         |
| No                                                                                 | 855(55.27%)                    |                                  | 244(35.01%)                     | Ref                | /       |
| Yes                                                                                | 692(44.73%)                    |                                  | 453(64.99%)                     | 5.337(4.182-6.811) | < 0.001 |

|                                                                                    |              |             |                    |         |
|------------------------------------------------------------------------------------|--------------|-------------|--------------------|---------|
| Do you think the authorized 9-valent HPV vaccine is safe?                          |              |             |                    |         |
| No                                                                                 | 224(14.48%)  | 80(11.48%)  | Ref                | /       |
| Yes                                                                                | 1323(85.52%) | 617(88.52%) | 0.835(0.547-1.274) | 0.403   |
| Do you think the 9-valent HPV vaccine could have unexpected side effects?          |              |             |                    |         |
| No                                                                                 | 975(63.03%)  | 455(65.28%) | Ref                | /       |
| Yes                                                                                | 572(36.97%)  | 242(34.72%) | 0.631(0.494-0.805) | < 0.001 |
| Do you think the authorized 9-valent HPV vaccine is effective?                     |              |             |                    |         |
| No                                                                                 | 184(19.00%)  | 64(9.18%)   | Ref                | /       |
| Yes                                                                                | 1363(81.00%) | 633(90.82%) | 0.895(0.556-1.441) | 0.647   |
| Would you recommend that your family and friends receive the 9-valent HPV vaccine? |              |             |                    |         |
| No                                                                                 | 294(19.00%)  | 74(10.62%)  | Ref                | /       |
| Yes                                                                                | 1253(81.00%) | 623(89.38%) | 3.359(2.281-4.948) | < 0.001 |

the P-value indicates whether the adjusted OR of particular sub-category is significant when compared with the reference category. OR: odds ratio; CI: confidence interval.
